# Supplementary material for: Traffic, Air Pollution, Minority and Socio-Economic Status: Addressing Inequities in Exposure and Risk
Source: PubMed Central journal article supplement (PMC4454972; doi:10.3390/ijerph120505355), 2015-05-19
Supplement: ijerph-12-05355-s001.pdf [file ijerph-12-05355-s001.pdf]

## Traffic, Air Pollution, Minority and Socio-Economic Status: Addressing Inequities in Exposure and Risk

| Variable                      | Source                    |
|-------------------------------|---------------------------|
| Mean Traffic Density          | Traffic Density Model     |
| Hazard Index All Sources      | MNRiskS                   |
| Cancer All Sources            | MNRiskS                   |
| Hazard Index On-Road Sources  | MNRiskS                   |
| Cancer On-Road Sources        | MNRiskS                   |
| Hazard Index Non-Road Sources | MNRiskS                   |
| Cancer Non-Road Sources       | MNRiskS                   |
| Hazard Index Area Sources     | MNRiskS                   |
| Cancer Area Sources           | MNRiskS                   |
| Hazard Index Point Sources    | MNRiskS                   |
| Cancer Point Sources          | MNRiskS                   |
| Population Density            | Decennial Census          |
| Asian NonHispanic             | Decennial Census          |
| Black NonHispanic             | Decennial Census          |
| Hispanic                      | Decennial Census          |
| Native American NonHispanic   | Decennial Census          |
| Non-White                     | Decennial Census          |
| White NonHispanic             | Decennial Census          |
| < High School                 | American Community Survey |
| Bachelor's Degree             | American Community Survey |
| Home Ownership %              | American Community Survey |
| House Value > \$250K          | American Community Survey |
| Median Home Value             | American Community Survey |
| Owner Occupied Housing        | American Community Survey |
| Rent < \$700                  | American Community Survey |
| Rent > 30% Income             | American Community Survey |
| Renter Occupied Household     | American Community Survey |
| > 1 Vehicle per HH            | American Community Survey |
| Commute by Walk or Transit    | American Community Survey |
| Drove Alone Commute           | American Community Survey |
| No Vehicles in HH             | American Community Survey |
| Vehicles per HH               | American Community Survey |
| < 100% Poverty Level          | American Community Survey |
| < 150% Poverty Level          | American Community Survey |
| HH Income < \$60K             | American Community Survey |
| HH Income > \$60K             | American Community Survey |
| Median HH Income              | American Community Survey |
| Children Under 10             | American Community Survey |
| Children Under 5              | American Community Survey |
| Female 20 to 39               | American Community Survey |

**Figure S1.** Variables explored in analyses.

**Table S1.** Non-point source categories and subcategories included in MNRiskS 2008.

| <b>On-Road Mobile Sources</b>   | <b>Non-Road Mobile Sources</b>  | <b>Area (Nonpoint) Sources</b>                    |
|---------------------------------|---------------------------------|---------------------------------------------------|
| Cars                            | Airports                        | Feedlots                                          |
| Buses                           | Commercial Marine Vessels       | Industrial, Commercial, and Institutional Boilers |
| Trucks<br>(diesel and gasoline) | Pleasure Craft                  | Composting                                        |
|                                 | Rail Yards                      | Animal Cremation                                  |
|                                 | Rail Operations                 | Food & Kindred Products                           |
|                                 | Agricultural Equipment          | Health Services                                   |
|                                 | Recreational Equipment          | Miscellaneous Roadway Emissions                   |
|                                 | Lawn & Garden Equipment         | Miscellaneous Agriculture & Pesticide Emissions   |
|                                 | Construction & Mining Equipment | Non-industrial Consumer & Commercial Activities   |
|                                 | Industrial Equipment            | Open Burning                                      |
|                                 | Commercial Equipment            | Petroleum & Products Storage & Transport          |
|                                 | Logging Equipment               | Residential Fuel Combustion                       |
|                                 |                                 | Residential Wood Combustion—                      |
|                                 |                                 | Outdoor Wood Boilers                              |
|                                 |                                 | Residential Wood Combustion                       |
|                                 |                                 | Indoor                                            |
|                                 |                                 | Residential Wood Combustion—                      |
|                                 |                                 | Outdoor Recreation                                |
|                                 |                                 | Surface Coating                                   |
|                                 |                                 | Agricultural Fires                                |
|                                 |                                 | Wildfires & Prescribed                            |

**Table S2.** Surrogates for apportioning non-point emissions to block groups.

| Area—Industrial + Commercial/Institutional                  | Commercial/Industrial Land Use in Metro—Outstate Land Use Categories 23,24 (Med. & High Intensity Developed) |
|-------------------------------------------------------------|--------------------------------------------------------------------------------------------------------------|
| area—composting & animal cremation                          | land area                                                                                                    |
| area—misc by population                                     | population                                                                                                   |
| area—food and kindred products                              | commercial land use in metro—outstate LU categories 23, 24 (med & high intensity developed)                  |
| area—health services                                        | Block groups where hospitals located from ReferenceUSA                                                       |
| area—misc roadway by VKT                                    | Vehicle Kilometers Travelled (VKT)                                                                           |
| area—misc ag/pesticide                                      | fraction of land in land use category 82 (crop production)                                                   |
| area—misc non-industrial: consumer & commercial             | Households                                                                                                   |
| area—open burning—yard & land                               | land area minus developed land area                                                                          |
| area—open burning—household waste                           | Households in undeveloped land (all categories except 21,22,23,24)                                           |
| area—petroleum & product storage & transport                | gas station sales in BG from ReferenceUSA                                                                    |
| area—residential fuel combustion                            | Households                                                                                                   |
| area—residential wood combustion indoor                     | Households                                                                                                   |
| area—residential wood combustion outdoor wood boiler        | Households in undeveloped land (all categories except 21,22,23,24)                                           |
| area—residential wood combustion outdoor recreation         | Households                                                                                                   |
| area—surface coating                                        | commercial/industrial in metro—outstate land use categories 23,24 (med & high intensity developed)           |
| area—Ag Fires                                               | land in land use categories 71 & 81 (Grassland/herbaceous, Pasture/Hay)                                      |
| area—Wildfires & Prescribed Forest Burning                  | model as individual volume sources                                                                           |
| nonroad—commercial marine vessels                           | EPA major waterways shapefile apportioned to block groups                                                    |
| nonroad—Pleasure Craft                                      | Water surface area                                                                                           |
| nonroad—railyards                                           | model as volume sources located at coordinates                                                               |
| nonroad—rail                                                | railroads shapefile with weighting for activity                                                              |
| nonroad—Agricultural Equipment                              | land in ag uses (land use categories 71, 81, 82)                                                             |
| nonroad—Off-highway Vehicle Recreational Equipment          | land area                                                                                                    |
| nonroad—Off-highway Vehicle—Lawn & Garden Equipment         | Households                                                                                                   |
| nonroad—Off-highway Vehicle—Construction & Mining Equipment | med&hi intensity developed outstate—combine construction + industrial/commercial in metro                    |

**Table S2. Cont.**

| <b>Area—Industrial + Commercial/Institutional</b> | <b>Commercial/Industrial Land Use in Metro—Outstate Land Use Categories 23,24 (Med. &amp; High Intensity Developed)</b> |
|---------------------------------------------------|-------------------------------------------------------------------------------------------------------------------------|
| nonroad—Off-highway Vehicle—Industrial Equipment  | commercial/industrial in metro—outstate land use categories 23,24 (med & high intensity developed)                      |
| nonroad—Off-highway Vehicle Commercial Equipment  | commercial/industrial in metro—outstate land use categories 23,24 (med & high intensity developed)                      |
| nonroad—Off-highway Vehicle—Logging Equipment     | land use categories forest = 41, 42, 43, 52                                                                             |
| onroad—lower traffic segments—gas                 | VKT                                                                                                                     |
| onroad—lower traffic segments—diesel              | diesel VKT                                                                                                              |
| onroad—high traffic segments—gas                  | model as individual volume sources (pseudo line sources)                                                                |
| onroad—high traffic segments—diesel               | model as individual volume sources (pseudo line sources)                                                                |

**Table S3.** List of pollutants and toxicity values used in the MNRiskS modeling system.

| COPC Name                            | CAS #     | RfD<br>[mg/kg/day] | Oral CSF<br>[mg/kg/day] | RFC<br>[mg/m <sup>3</sup> ] | Inhalation<br>URF<br>[1/(μg/m <sup>3</sup> )] |
|--------------------------------------|-----------|--------------------|-------------------------|-----------------------------|-----------------------------------------------|
| 1,2,4TRIMETHYLBENZENE                | 95-63-6   | 0.05               |                         | 0.007                       |                                               |
| 1,2-Epoxybutane                      | 106-88-7  |                    |                         | 0.02                        |                                               |
| 1,3BUTADIENE                         | 106-99-0  |                    | 3.4                     | 0.002                       | 5.88E-05                                      |
| 2(2BUTOXYETHOXY)ETHANO<br>L          | 112-34-5  | 0.03               |                         | 0.0001                      |                                               |
| 2,2,4TRIMETHYLPENTANE                | 540-84-1  |                    |                         |                             |                                               |
| 2,4,4'-Trichlorobiphenyl             | 7012-37-5 | 5.00E-05           | 2                       | 4.00E-07                    | 0.00057                                       |
| 2,4D, SALTS AND ESTERS               | 94-75-7   | 0.01               |                         |                             |                                               |
| 2BUTOXYETHYL ACETATE                 | 112-07-2  |                    |                         |                             |                                               |
| 2CHLOROACETOPHENONE                  | 532-27-4  |                    |                         | 3.00E-05                    |                                               |
| 2METHYLNAPHTHALENE                   | 91-57-6   | 0.004              |                         |                             |                                               |
| 2-Monochlorobiphenyl                 | 2051-60-7 | 5.00E-05           | 2                       | 4.00E-07                    | 0.00057                                       |
| 2NITROPROPANE                        | 79-46-9   | 0.00571            | 9.4                     | 0.02                        |                                               |
| 3METHYLCHOLANTHRENE                  | 56-49-5   |                    | 22                      |                             | 0.0063                                        |
| 4,4METHYLENE DIANILINE               | 101-77-9  | 0.08               | 1.6                     | 0.02                        | 0.00046                                       |
| 4,4METHYLENEDIPHENYL<br>DIISOCYANATE | 101-68-8  |                    |                         | 0.0006                      |                                               |
| 5METHYL CHRYSENE                     | 3697-24-3 |                    | 2.8                     |                             | 0.0011                                        |
| Acenaphthene                         | 83-32-9   | 0.06               |                         |                             |                                               |
| ACENAPHTHYLENE                       | 208-96-8  |                    |                         |                             |                                               |
| Acetaldehyde                         | 75-07-0   |                    |                         | 0.009                       | 2.20E-06                                      |
| ACETAMIDE                            | 60-35-5   |                    | 0.07                    |                             | 2.00E-05                                      |
| Acetone                              | 67-64-1   | 0.9                |                         |                             |                                               |
| Acetonitrile                         | 75-05-8   | 0.006              |                         | 0.06                        |                                               |
| Acetophenone                         | 98-86-2   | 0.1                |                         |                             |                                               |
| Acrolein                             | 107-02-8  | 0.0005             |                         | 0.0004                      |                                               |
| ACRYLAMIDE                           | 79-06-1   | 0.002              | 0.5                     | 0.006                       | 0.0001                                        |
| ACRYLIC ACID                         | 79-10-7   | 0.5                |                         | 0.001                       |                                               |
| Acrylonitrile                        | 107-13-1  | 0.001              | 0.54                    | 0.002                       | 6.80E-05                                      |
| ALDEHYDES                            | E761379   |                    |                         | 8.00E-05                    | 5.00E-06                                      |
| ALLYL CHLORIDE                       | 107-05-1  | 0.000286           | 0.021                   | 0.001                       | 6.00E-06                                      |
| AMMONIA                              | 7664-41-7 |                    |                         | 0.08                        |                                               |
| Aniline                              | 62-53-3   | 0.007              | 0.0057                  | 0.001                       | 1.60E-06                                      |
| Anthracene                           | 120-12-7  | 0.3                |                         |                             |                                               |
| Antimony                             | 7440-36-0 | 0.0004             |                         | 0.0002                      |                                               |
| Arsenic                              | 7440-38-2 | 3.50E-06           | 1.5                     | 1.50E-05                    | 0.0043                                        |
| Atrazine                             | 1912-24-9 | 0.035              | 0.222                   |                             |                                               |
| BENZ(BK)FL                           | E17133943 |                    | 0.28                    |                             | 0.00011                                       |
| Benzaldehyde                         | 100-52-7  | 0.1                |                         | 0.02                        |                                               |
| Benzene                              | 71-43-2   | 0.004              | 0.055                   | 0.03                        | 7.80E-06                                      |

Table S3. Cont.

| COPC Name                     | CAS #      | RfD<br>[mg/kg/day] | Oral CSF<br>[mg/kg/day] | RFC<br>[mg/m <sup>3</sup> ] | Inhalation<br>URF<br>[1/(μg/m <sup>3</sup> )] |
|-------------------------------|------------|--------------------|-------------------------|-----------------------------|-----------------------------------------------|
| Benzo(a)anthracene            | 56-55-3    |                    | 0.28                    |                             | 0.00011                                       |
| Benzo(a)pyrene                | 50-32-8    |                    | 2.8                     |                             | 0.0011                                        |
| Benzo(b)fluoranthene          | 205-99-2   |                    | 0.28                    |                             | 0.00011                                       |
| BENZO(E)PYRENE                | 192-97-2   |                    |                         |                             |                                               |
| BENZO(G,H,I)FLUORANTHENE      | 203-12-3   |                    |                         |                             |                                               |
| BENZO(G,H,I)PERYLENE          | 191-24-2   |                    |                         |                             |                                               |
| BENZO(J)FLUO                  | 205-82-3   |                    | 0.28                    |                             | 0.00011                                       |
| Benzo(k)fluoranthene          | 207-08-9   |                    | 0.28                    |                             | 0.00011                                       |
| BENZOFLUORANTHENES            | 56832-73-6 |                    | 0.28                    |                             | 0.00011                                       |
| Benzyl chloride               | 100-44-7   | 0.002              | 0.17                    | 0.001                       | 4.90E-05                                      |
| Beryllium                     | 7440-41-7  | 0.002              | 8.4                     | 2.00E-05                    | 0.0024                                        |
| BIPHENYL                      | 92-52-4    | 0.05               |                         |                             |                                               |
| Bis(2-chlorethyl)ether        | 111-44-4   |                    | 1.1                     |                             | 0.00033                                       |
| Bromoform (Tribromomethane)   | 75-25-2    | 0.02               | 0.00793                 |                             | 1.10E-06                                      |
| BUTYL CARBITOL ACETATE        | 124-17-4   |                    |                         |                             |                                               |
| Butylbenzylphthalate          | 85-68-7    | 0.2                | 0.0019                  |                             |                                               |
| BUTYRALDEHYDE                 | 123-72-8   |                    |                         | 0.07                        |                                               |
| Cadmium                       | 7440-43-9  | 0.001              |                         | 2.00E-05                    | 0.0018                                        |
| CARBITOL                      | 111-90-0   | 2                  |                         |                             |                                               |
| CARBITOL ACETATE              | 112-15-2   |                    |                         |                             |                                               |
| Carbon disulfide              | 75-15-0    | 0.1                |                         | 0.7                         |                                               |
| CARBON MONOXIDE               | 630-08-0   |                    |                         |                             |                                               |
| Carbon tetrachloride          | 56-23-5    | 0.004              | 0.07                    | 0.1                         | 6.00E-06                                      |
| CARBONYL SULFIDE              | 463-58-1   |                    |                         |                             |                                               |
| CATECHOL                      | 120-80-9   |                    | 0.009                   |                             |                                               |
| CELLOSOLVE                    | 110-80-5   | 0.4                |                         | 0.2                         |                                               |
| CELLOSOLVE ACETATE            | 111-15-9   | 0.3                |                         | 0.3                         |                                               |
| Chlorine                      | 7782-50-5  | 0.1                |                         | 0.0002                      |                                               |
| CHLOROACETIC ACID             | 79-11-8    | 0.002              |                         |                             |                                               |
| Chlorobenzene                 | 108-90-7   | 0.02               |                         | 1                           |                                               |
| Chloroethane                  | 75-00-3    |                    |                         | 10                          |                                               |
| Chloroform (Trichloromethane) | 67-66-3    | 0.01               | 0.032                   | 0.3                         | 2.30E-05                                      |
| Chloronaphthalene,2-          | 91-58-7    | 0.08               |                         |                             |                                               |
| CHLOROPRENE                   | 126-99-8   | 0.02               |                         | 0.02                        | 0.0003                                        |
| CHROM6 CMP                    | E5242631   |                    |                         |                             |                                               |
| Chromium                      | 7440-47-3  |                    |                         |                             |                                               |
| CHROMIUM (III)                | 16065-83-1 | 1.5                |                         |                             |                                               |
| Chromium, hexavalent          | 18540-29-9 | 0.003              | 0.5                     | 8.00E-06                    | 0.012                                         |
| Chrysene                      | 218-01-9   |                    | 0.028                   |                             | 1.10E-05                                      |

Table S3. Cont.

| COPC Name                                    | CAS #      | RfD<br>[mg/kg/day] | Oral CSF<br>[mg/kg/day] | RFC<br>[mg/m <sup>3</sup> ] | Inhalation<br>URF<br>[1/(μg/m <sup>3</sup> )] |
|----------------------------------------------|------------|--------------------|-------------------------|-----------------------------|-----------------------------------------------|
| COBALT                                       | 7440-48-4  | 0.0003             |                         | 6.00E-06                    | 0.009                                         |
| COPPER                                       | 7440-50-8  | 0.037              |                         |                             |                                               |
| CRESOL MIXED ISOMERS                         | 1319-77-3  | 0.005              |                         | 0.6                         |                                               |
| Cresol, m-                                   | 108-39-4   | 0.05               |                         | 0.6                         |                                               |
| Cresol, o-                                   | 95-48-7    | 0.05               |                         | 0.6                         |                                               |
| Cresol, p-                                   | 106-44-5   | 0.005              |                         | 0.6                         |                                               |
| CROTONALDEHYDE                               | 123-73-9   | 0.001              | 1.9                     |                             |                                               |
| Cumene (Isopropylbenzene)                    | 98-82-8    | 0.1                |                         | 0.4                         |                                               |
| CYANIDE CMP                                  | 57-12-5    | 0.0006             |                         | 0.003                       |                                               |
| Dibenz(a,h)anthracene                        | 53-70-3    |                    | 4.1                     |                             | 0.0012                                        |
| DIBENZ(AE)PY                                 | 192-65-4   |                    | 1.1                     |                             | 0.0011                                        |
| DIBENZ(AH)PY                                 | 189-64-0   |                    | 2.5                     |                             | 0.011                                         |
| DIBENZ(AI)PY                                 | 189-55-9   |                    | 1.7                     |                             | 0.011                                         |
| DIBENZ(AJ)AC                                 | 224-42-0   |                    | 0.3                     |                             | 0.00011                                       |
| DIBENZ(AL)PY                                 | 191-30-0   |                    | 84                      |                             | 0.011                                         |
| DIBENZOFURAN                                 | 132-64-9   | 0.001              |                         |                             |                                               |
| Dibromo-3-chloropropane, 1,2-                | 96-12-8    | 0.00057            | 7                       | 0.0002                      | 0.0019                                        |
| Dichlorobenzene, 1,2-                        | 95-50-1    | 0.09               |                         | 0.2                         |                                               |
| Dichlorobenzene, 1,3-                        | 541-73-1   |                    |                         |                             |                                               |
| Dichlorobenzene, 1,4-                        | 106-46-7   | 0.07               | 0.0054                  | 0.8                         | 1.10E-05                                      |
| DICHLOROBENZENES                             | 25321-22-6 | 0.09               | 0.024                   | 0.8                         | 1.10E-05                                      |
| Dichloroethane 1,1-                          | 75-34-3    | 0.2                | 0.0057                  |                             | 1.60E-06                                      |
| Dichloroethane, 1,2-(Ethylene<br>Dichloride) | 107-06-2   | 0.03               | 0.091                   | 0.4                         | 2.60E-05                                      |
| Dichloroethylene 1,1-                        | 75-35-4    | 0.05               |                         | 0.2                         |                                               |
| Dichloroethylene, cis-1,2-                   | 156-59-2   | 0.011              |                         |                             |                                               |
| Dichloropropane, 1,2-                        | 78-87-5    | 0.09               | 0.036                   | 0.004                       |                                               |
| Dichloropropene, 1,3- (cis)                  | 542-75-6   | 0.03               | 0.1                     | 0.02                        | 4.00E-06                                      |
| Dichlorvos                                   | 62-73-7    | 0.0005             | 0.29                    | 0.0005                      | 8.30E-05                                      |
| DICLPROP,13C                                 | 10061-01-5 | 0.03               | 0.1                     | 0.02                        | 4.00E-06                                      |
| DIETHANOLAMINE                               | 111-42-2   | 0.02               |                         | 0.003                       |                                               |
| DIETHYL SULFATE                              | 64-67-5    |                    | 1.2                     |                             |                                               |
| Dimethyl phthalate                           | 131-11-3   | 10                 |                         |                             |                                               |
| DIMETHYL SULFATE                             | 77-78-1    |                    |                         |                             |                                               |
| DIMETHYLANIL                                 | 121-69-7   | 0.002              |                         |                             |                                               |
| DIMETHYLBENZ(A)ANTHRAC<br>ENE                | 57-97-6    |                    | 250                     |                             | 0.071                                         |
| DIMETHYLFORMAMIDE, N,N                       | 68-12-2    | 0.1                |                         | 0.03                        |                                               |
| Dimethoxybenzidine, 3,3'-                    | 119-90-4   |                    | 0.014                   |                             | 4.00E-05                                      |
| Di-n-butyl phthalate                         | 84-74-2    | 0.1                |                         |                             |                                               |

Table S3. Cont.

| COPC Name                                        | CAS #      | RfD<br>[mg/kg/day] | Oral CSF<br>[mg/kg/day] | RFC<br>[mg/m <sup>3</sup> ] | Inhalation<br>URF<br>[1/(μg/m <sup>3</sup> )] |
|--------------------------------------------------|------------|--------------------|-------------------------|-----------------------------|-----------------------------------------------|
| Dinitrophenol, 2,4-                              | 51-28-5    | 0.002              |                         |                             |                                               |
| Dinitrotoluene, 2,4-                             | 121-14-2   | 0.002              | 0.31                    |                             | 8.90E-05                                      |
| Di-n-octylphthalate                              | 117-84-0   | 0.01               |                         |                             |                                               |
| Dioxane, 1,4-                                    | 123-91-1   | 0.03               | 0.1                     | 3                           | 7.70E-06                                      |
| DIOXN 2378EQ                                     | E17000407  | 1.00E-08           | 1,400,000               | 4.00E-08                    | 400                                           |
| Epichlorohydrin (1-Chloro-2,3-epoxypropane)      | 106-89-8   | 0.006              | 0.0099                  | 0.001                       | 1.20E-06                                      |
| ETHYL ACRYLATE                                   | 140-88-5   | 0.0137             | 0.048                   |                             |                                               |
| Ethylbenzene                                     | 100-41-4   | 0.016              |                         | 1                           | 2.50E-06                                      |
| Ethylene Dibromide                               | 106-93-4   | 0.009              | 2                       | 0.009                       | 0.00022                                       |
| ETHYLENE GLYCOL                                  | 107-21-1   | 2                  |                         | 0.4                         |                                               |
| Ethylene oxide                                   | 75-21-8    | 0.00143            | 1.02                    | 0.03                        | 8.80E-05                                      |
| Ethylhexyl phthalate, bis-2-                     | 117-81-7   | 0.02               | 0.014                   |                             | 2.40E-06                                      |
| FINE MNRLFIB                                     | E649533    |                    |                         |                             |                                               |
| Fluoranthene                                     | 206-44-0   | 0.04               |                         |                             |                                               |
| Fluorene                                         | 86-73-7    | 0.04               |                         |                             |                                               |
| Formaldehyde                                     | 50-00-0    | 0.2                |                         | 0.009                       | 5.00E-06                                      |
| GLYCOL ETHRS                                     | E651141    |                    |                         | 0.02                        |                                               |
| HeptaCDD, 1,2,3,4,6,7,8-                         | 35822-46-9 | 7.00E-08           | 14000                   | 4.00E-06                    | 4                                             |
| HeptaCDF, 1,2,3,4,6,7,8-                         | 67562-39-4 | 7.00E-08           | 14000                   | 4.00E-06                    | 4                                             |
| HeptaCDF, 1,2,3,4,7,8,9-                         | 55673-89-7 | 7.00E-08           | 14000                   | 4.00E-06                    | 4                                             |
| Heptachlorobiphenyls, Total                      | 28655-71-2 | 0.00033            | 30                      | 0.0013                      | 0.008571429                                   |
| HexaCDD, 1,2,3,4,7,8-                            | 39227-28-6 | 7.00E-09           | 140000                  | 4.00E-07                    | 40                                            |
| HexaCDD, 1,2,3,6,7,8-                            | 57653-85-7 | 7.00E-09           | 6200                    | 4.00E-07                    | 40                                            |
| HexaCDD, 1,2,3,7,8,9-                            | 19408-74-3 | 7.00E-09           | 140000                  | 4.00E-07                    | 40                                            |
| HexaCDF, 1,2,3,4,7,8-                            | 70648-26-9 | 7.00E-09           | 140000                  | 4.00E-07                    | 40                                            |
| HexaCDF, 1,2,3,6,7,8-                            | 57117-44-9 | 7.00E-09           | 140000                  | 4.00E-07                    | 40                                            |
| HexaCDF, 1,2,3,7,8,9-                            | 72918-21-9 | 7.00E-09           | 140000                  | 4.00E-07                    | 40                                            |
| HexaCDF, 2,3,4,6,7,8-                            | 60851-34-5 | 7.00E-09           | 140000                  | 4.00E-07                    | 40                                            |
| Hexachloro-1,3-butadiene<br>(Perchlorobutadiene) | 87-68-3    | 0.001              | 0.078                   |                             | 2.20E-05                                      |
| Hexachlorobenzene                                | 118-74-1   | 0.0008             | 1.6                     |                             | 0.00046                                       |
| Hexachlorobiphenyls, Total                       | 26601-64-9 | 3.30E-07           | 30000                   | 1.30E-06                    | 8.571428571                                   |
| Hexachlorocyclopentadiene                        | 77-47-4    | 0.006              |                         | 0.0002                      |                                               |
| Hexachloroethane<br>(Perchloroethane)            | 67-72-1    | 0.001              | 0.014                   |                             | 4.00E-06                                      |
| HEXAMETHYLENE1,6DIISOC<br>YANATE                 | 822-06-0   |                    |                         | 1.00E-05                    |                                               |
| HEXYETHANOL2                                     | 112-25-4   |                    |                         |                             |                                               |
| HYDRAZINE                                        | 302-01-2   | 5.71E-05           | 3                       | 0.0002                      | 0.0049                                        |



Table S3. Cont.

| COPC Name                        | CAS #      | RfD<br>[mg/kg/day] | Oral CSF<br>[mg/kg/day] | RFC<br>[mg/m <sup>3</sup> ] | Inhalation<br>URF<br>[1/(µg/m <sup>3</sup> )] |
|----------------------------------|------------|--------------------|-------------------------|-----------------------------|-----------------------------------------------|
| Hydrogen chloride                | 7647-01-0  |                    |                         | 0.02                        |                                               |
| HYDROGEN FLUORIDE                | 7664-39-3  | 0.04               |                         | 0.014                       |                                               |
| HYDROQUINONE                     | 123-31-9   | 0.04               | 0.056                   |                             |                                               |
| Indeno(1,2,3-cd) pyrene          | 193-39-5   |                    | 0.28                    |                             | 0.00011                                       |
| Isophorone                       | 78-59-1    | 0.2                | 0.00095                 | 2                           |                                               |
| Lead                             | 7439-92-1  |                    | 0.0085                  | 0.00015                     | 1.20E-05                                      |
| MALEIC ANHYDRIDE                 | 108-31-6   | 0.1                |                         | 0.0007                      |                                               |
| MANGANESE                        | 7439-96-5  | 0.14               |                         | 0.0002                      |                                               |
| Mercuric chloride                | 7487-94-7  |                    |                         |                             |                                               |
| Mercury                          | 7439-97-6  | 0.0003             |                         | 0.0003                      |                                               |
| METHANE                          | 74-82-8    |                    |                         |                             |                                               |
| Methanol                         | 67-56-1    | 0.5                |                         | 4                           |                                               |
| Methyl bromide (Bromomethane)    | 74-83-9    | 0.0014             |                         | 0.005                       |                                               |
| METHYL CARBITOL                  | 111-77-3   |                    |                         |                             |                                               |
| Methyl Cellosolve Acetate        | 110-49-6   | 0.008              |                         | 0.09                        |                                               |
| Methyl chloride (Chloromethane)  | 74-87-3    |                    |                         | 0.09                        |                                               |
| Methyl ethyl ketone (2-Butanone) | 78-93-3    | 0.6                |                         | 5                           |                                               |
| METHYL HYDRAZINE                 | 60-34-4    | 0.001              | 1.1                     |                             |                                               |
| METHYL IODIDE                    | 74-88-4    |                    | 2.9                     |                             |                                               |
| Methyl isobutyl ketone           | 108-10-1   | 0.08               |                         | 3                           |                                               |
| Methyl mercury                   | 22967-92-6 | 0.0001             |                         | 0.00035                     |                                               |
| METHYL METHACRYLATE              | 80-62-6    | 1.4                |                         | 0.7                         |                                               |
| METHYL TERT BUTYL ETHER          | 1634-04-4  | 0.3                |                         | 3                           | 2.60E-07                                      |
| METHYLANTHRACENES                | 26914-18-1 |                    |                         |                             |                                               |
| Methylene chloride               | 75-09-2    | 0.006              | 0.002                   | 0.6                         | 4.70E-07                                      |
| METHYLNAPHTHALENE                | 90-12-0    |                    |                         |                             |                                               |
| Naphthalene                      | 91-20-3    | 0.02               | 0.12                    | 0.009                       | 3.40E-05                                      |
| NHEXANE                          | 110-54-3   | 0.06               |                         | 2                           |                                               |
| NHEXYL CARBITOL                  | 112-59-4   |                    |                         |                             |                                               |
| Nickel                           | 7440-02-0  | 0.011              |                         | 1.40E-05                    | 0.00048                                       |
| Nitrobenzene                     | 98-95-3    | 0.002              |                         | 0.009                       | 4.00E-05                                      |
| Nitrophenol, 4-                  | 100-02-7   | 0.008              |                         |                             |                                               |
| n-Nitrosodimethylamine           | 62-75-9    | 8.00E-06           | 51                      |                             | 0.014                                         |
| OctaCDD, 1,2,3,4,6,7,8,9-        | 3268-87-9  | 2.33E-06           | 420                     | 0.000133333                 | 0.12                                          |
| OctaCDF, 1,2,3,4,6,7,8,9-        | 39001-02-0 | 2.33E-06           | 420                     | 0.000133333                 | 0.12                                          |
| PentaCDD, 1,2,3,7,8-             | 40321-76-4 | 7.00E-10           | 1,400,000               | 4.00E-08                    | 400                                           |
| PentaCDF, 1,2,3,7,8-             | 57117-41-6 | 2.33E-09           | 42,000                  | 1.33E-06                    | 12                                            |
| PentaCDF, 2,3,4,7,8-             | 57117-31-4 | 2.33E-10           | 420,000                 | 1.33E-07                    | 120                                           |

Table S3. Cont.

| COPC Name                                                  | CAS #           | RfD<br>[mg/kg/day] | Oral CSF<br>[mg/kg/day] | RFC<br>[mg/m <sup>3</sup> ] | Inhalation<br>URF<br>[1/(µg/m <sup>3</sup> )] |
|------------------------------------------------------------|-----------------|--------------------|-------------------------|-----------------------------|-----------------------------------------------|
| Pentachlorobiphenyls, Total                                | 25429-29-2      | 1.00E-07           | 100,000                 | 4.00E-07                    | 28.57142857                                   |
| Pentachloronitrobenzene (PCNB)                             | 82-68-8         | 0.003              | 0.26                    | 0.011                       | 7.40E-05                                      |
| Pentachlorophenol                                          | 87-86-5         | 0.005              | 0.4                     |                             | 5.10E-06                                      |
| PERYLENE                                                   | 198-55-0        |                    |                         |                             |                                               |
| Phenanthrene                                               | 85-01-8         |                    |                         |                             |                                               |
| Phenol                                                     | 108-95-2        | 0.3                |                         | 0.2                         |                                               |
| PHOSPHINE                                                  | 7803-51-2       | 0.0003             |                         | 0.0003                      |                                               |
| PHOSPHORUS (YELLOW OR<br>WHITE)                            | 7723-14-0       | 2.00E-05           |                         |                             |                                               |
| Phthalic anhydride (1,2-Benzene<br>dicarboxylic anhydride) | 85-44-9         | 2                  |                         | 0.02                        |                                               |
| PM10                                                       | E1647619        |                    |                         |                             |                                               |
| PM2.5 DIESEL                                               | MDPM25          |                    |                         | 0.005                       | 0.0003                                        |
| PM2.5                                                      | E1647635        |                    |                         |                             |                                               |
| POLYCHLORINATED<br>BIPHENYLS (PCBS)                        | 1336-36-3       | 5.00E-05           | 2                       | 4.00E-07                    | 0.00057                                       |
| PPHENYLENEDIAMINE                                          | 106-50-3        | 0.19               |                         |                             |                                               |
| PROPIONALDEHYDE                                            | 123-38-6        | 0.008              |                         | 0.008                       |                                               |
| PROPYL CELLOSOLVE                                          | 2807-30-9       |                    |                         |                             |                                               |
| PROPYLENE OXIDE                                            | 75-56-9         | 0.00857            | 0.24                    | 0.03                        | 3.70E-06                                      |
| Pyrene                                                     | 129-00-0        | 0.03               |                         |                             |                                               |
| QUINONE                                                    | 106-51-4        |                    |                         |                             |                                               |
| Selenium                                                   | 7782-49-2       | 0.005              |                         | 0.02                        |                                               |
| Styrene                                                    | 100-42-5        | 0.2                |                         | 1                           |                                               |
| SULFUR DIOXIDE                                             | 9/5/7446        |                    |                         |                             |                                               |
| TetraCDD, 2,3,7,8-                                         | 1746-01-6       | 7.00E-10           | 1400000                 | 4.00E-08                    | 400                                           |
| TetraCDF, 2,3,7,8-                                         | 51207-31-9      | 7.00E-09           | 140000                  | 4.00E-07                    | 40                                            |
| Tetrachlorobiphenyls, Total                                | 26914-33-0      | 3.30E-05           | 300                     | 0.00013                     | 0.085714286                                   |
| Tetrachloroethane, 1,1,2,2-                                | 79-34-5         | 0.02               | 0.2                     |                             | 5.80E-05                                      |
| Tetrachloroethylene<br>(Perchloroethylene)                 | 127-18-4        | 0.006              | 0.0021                  | 0.1                         | 5.00E-07                                      |
| Toluene                                                    | 108-88-3        | 0.08               |                         | 0.4                         |                                               |
| TOLUENE2,4DIISOCYANATE                                     | 584-84-9        |                    |                         | 7.00E-05                    | 1.10E-05                                      |
| Toluidine, o-                                              | 95-53-4         |                    | 0.016                   |                             | 5.10E-05                                      |
| TOTAL PAH                                                  | 130498-29-<br>2 |                    | 0.504                   |                             | 5.50E-05                                      |
| Trichlorobenzene, 1,2,4-                                   | 120-82-1        | 0.01               | 0.0036                  |                             |                                               |
| Trichloroethane, 1,1,1-                                    | 71-55-6         | 2                  |                         | 5                           |                                               |
| Trichloroethane, 1,1,2-                                    | 79-00-5         | 0.004              | 0.057                   |                             | 1.60E-05                                      |
| Trichloroethylene                                          | 79-01-6         | 0.0005             | 0.046                   | 0.002                       | 3.30E-06                                      |

Table S3. Cont.

| COPC Name                                    | CAS #      | RfD<br>[mg/kg/day] | Oral CSF<br>[mg/kg/day] | RFC<br>[mg/m <sup>3</sup> ] | Inhalation<br>URF<br>[1/(μg/m <sup>3</sup> )] |
|----------------------------------------------|------------|--------------------|-------------------------|-----------------------------|-----------------------------------------------|
| Trichlorofluoromethane<br>(Freon 11)         | 75-69-4    | 0.3                |                         |                             |                                               |
| Trichlorophenol, 2,4,5-                      | 95-95-4    | 0.1                |                         | 0.35                        |                                               |
| Trichlorophenol, 2,4,6-                      | 88-06-2    | 0.001              | 0.011                   |                             | 3.10E-06                                      |
| TRICHLOROTRIFLUOROMET<br>HANE (CFC113, R113) | 76-13-1    | 30                 |                         |                             |                                               |
| TRIETHYLAMINE                                | 121-44-8   | 0.002              |                         | 0.007                       |                                               |
| TRIFLURALIN                                  | 1582-09-8  | 0.0075             | 0.0077                  |                             |                                               |
| TRIMETHYLBENZENE                             | 25551-13-7 |                    |                         |                             |                                               |
| Trimethylbenzene, 1,3,5-                     | 108-67-8   | 0.05               |                         |                             |                                               |
| Vinyl Acetate                                | 108-05-4   | 1                  |                         | 0.2                         |                                               |
| Vinyl Chloride                               | 75-01-4    | 0.003              | 1.5                     | 0.1                         | 8.80E-06                                      |
| XYLENES (MIXED ISOMERS)                      | 1330-20-7  | 0.2                |                         | 0.1                         |                                               |

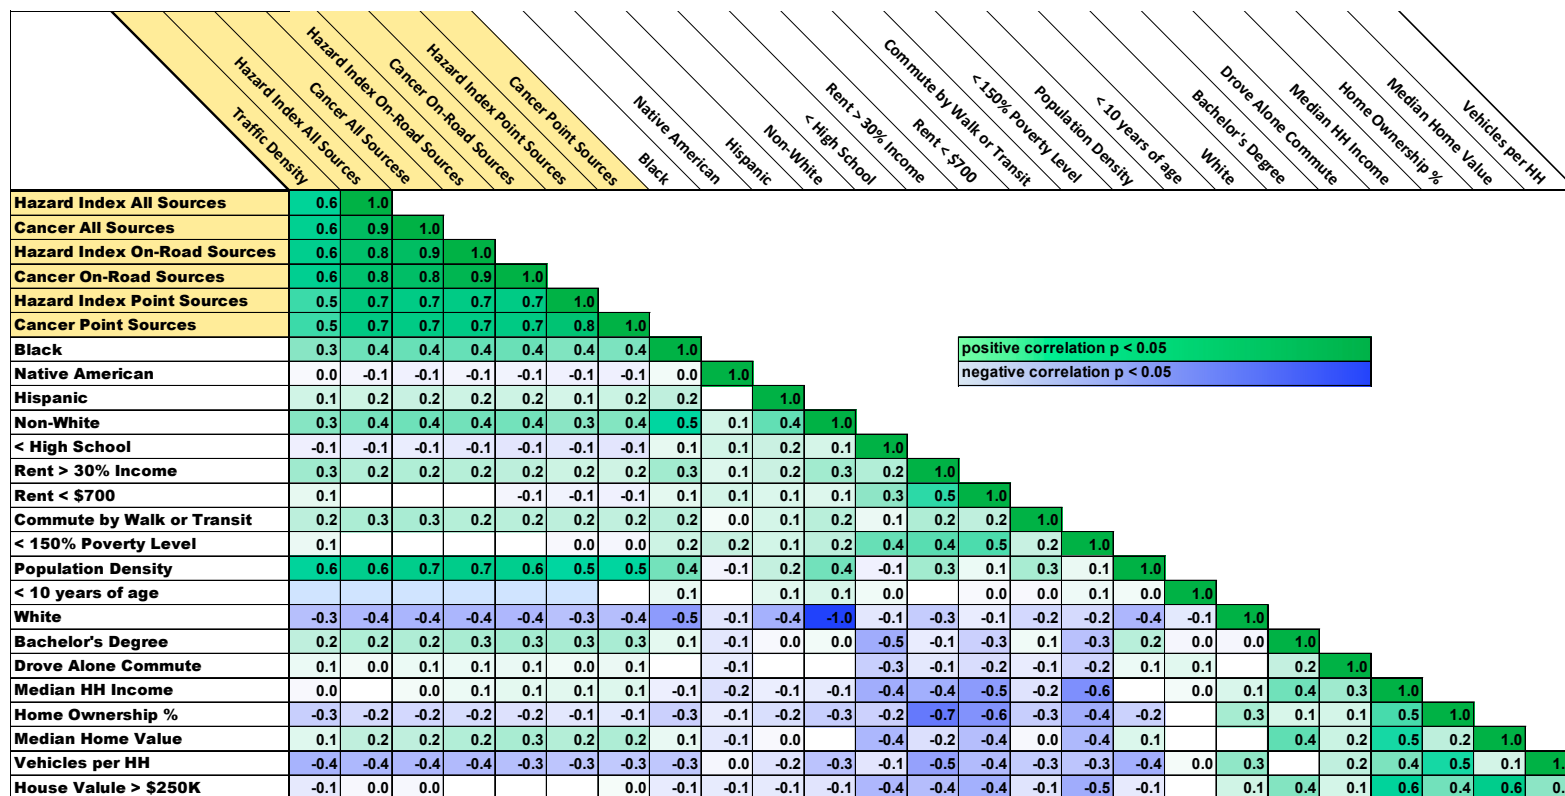

Figure S2. Kendall's Tau-b correlation matrix for all of Minnesota including both the metro and non-metro areas.

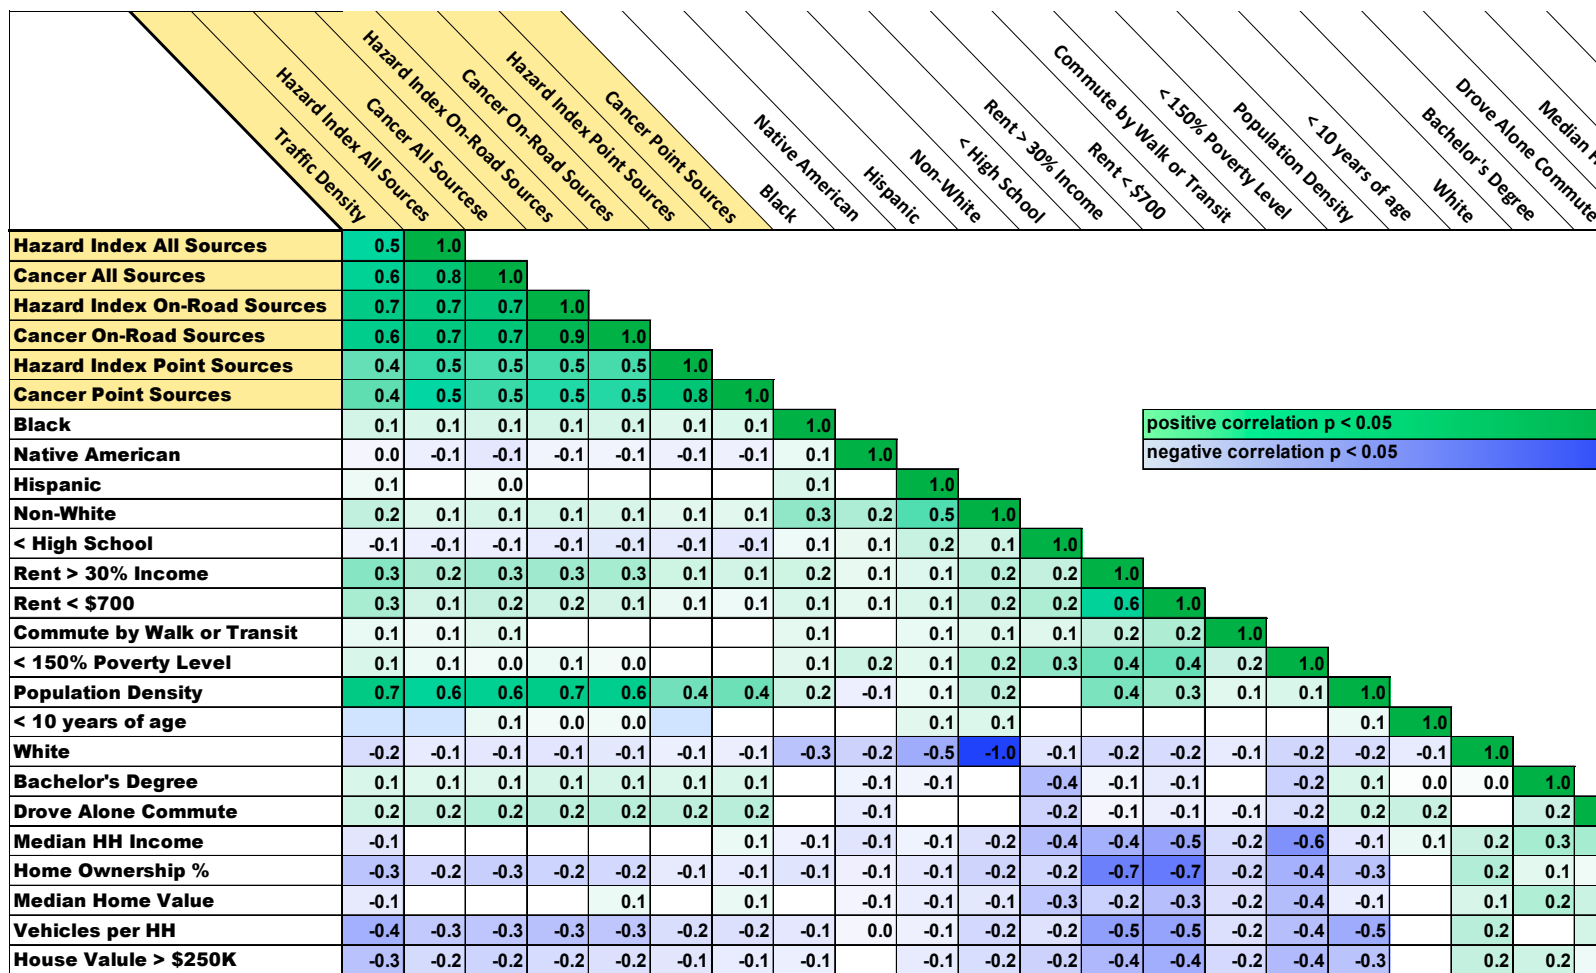

Figure S3. Kendall's Tau-b correlation matrix for the non-metro areas of Minnesota.

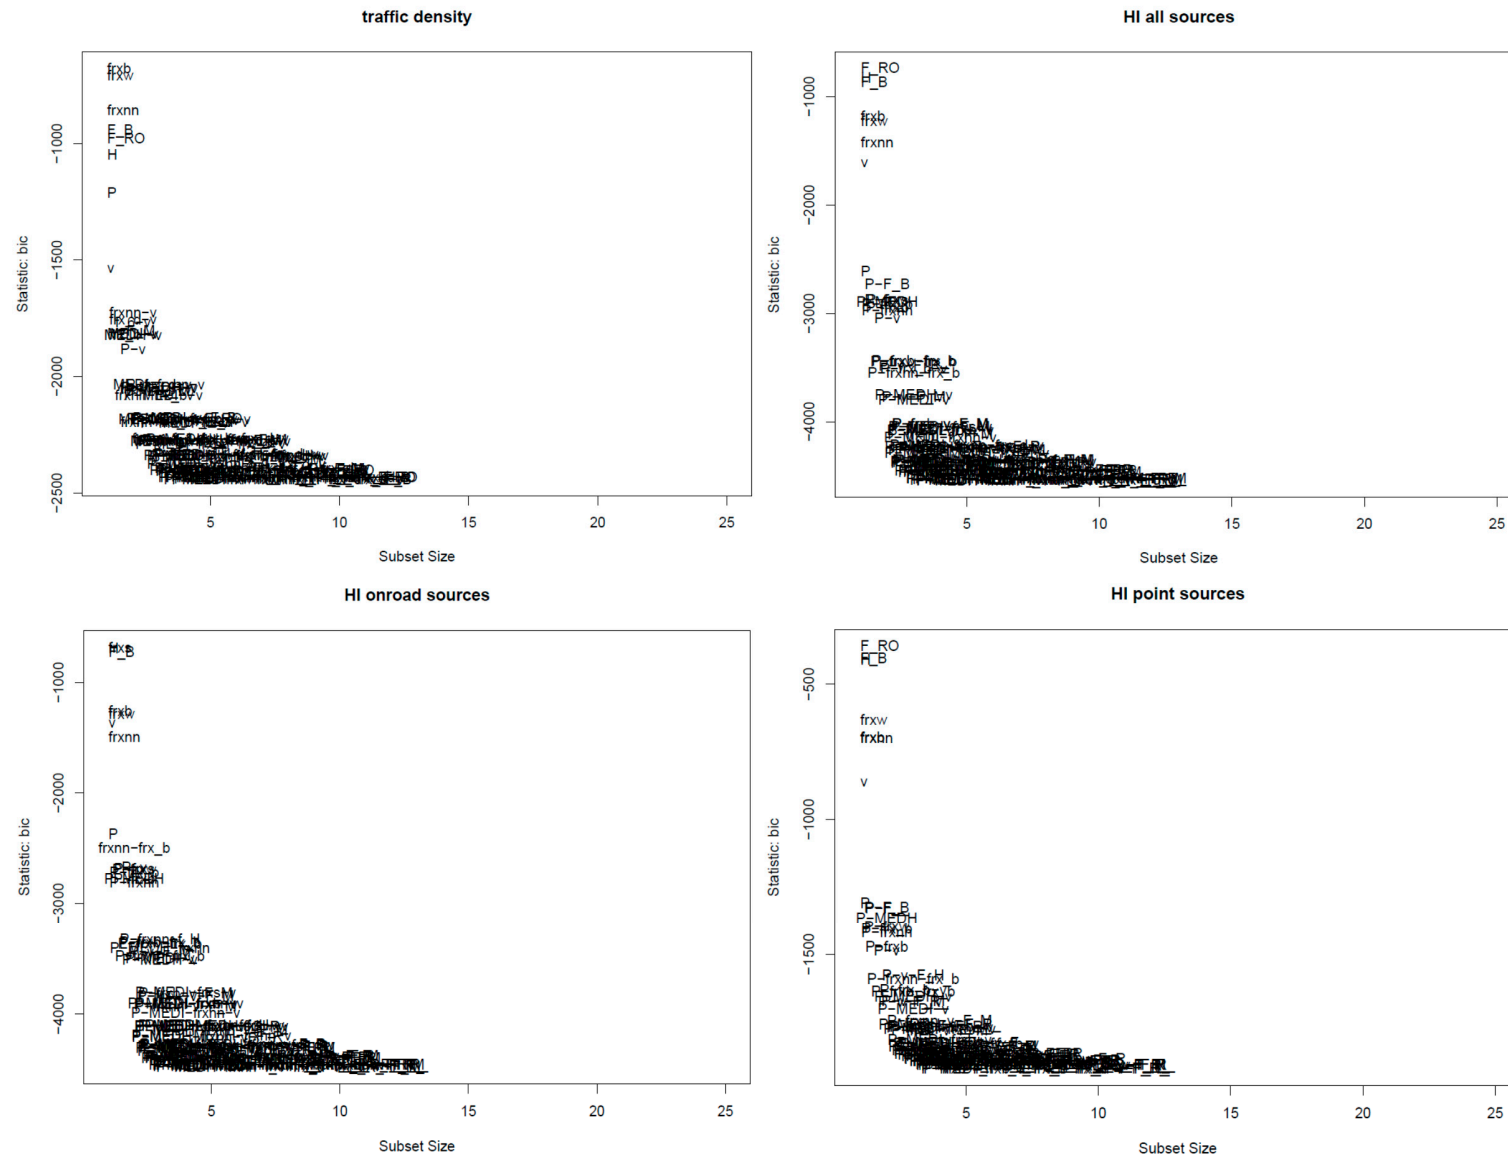

**Figure S4.** Regsubsets output showing the decrease (improvement) in the Bayesian Information Criterion as additional variables are added to the models relating traffic density, hazard index from all sources of air pollution, hazard index from on-road mobile sources of air pollution, and hazard index from point sources of air pollution to demographic variables.

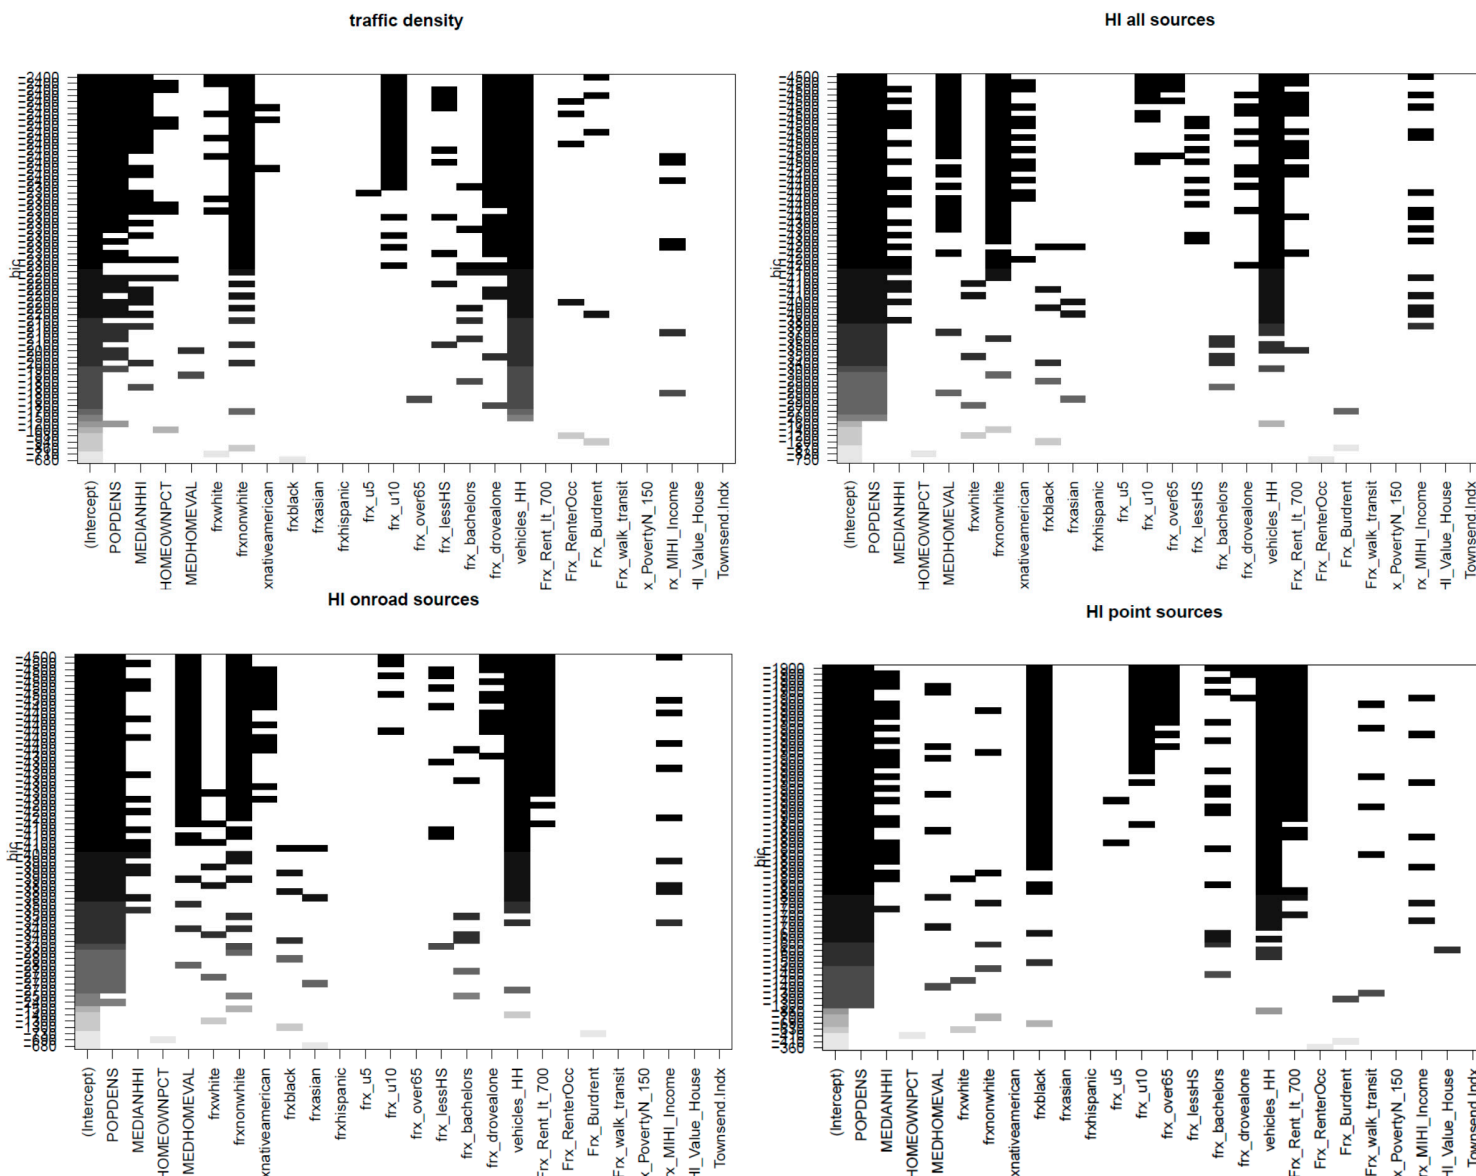

**Figure S5.** Regsubsets output showing the Bayesian Information Criterion for subsets of models relating demographic variables to traffic density, hazard index from all sources of air pollution, hazard index from on-road mobile sources of air pollution, and hazard index from point sources of air pollution.

| Dependent Variable >>><br>Independent Variables vvv | Non-Cancer Hazard Index |             |                       |                |               |             | Cancer Risk           |                |               |             |       |
|-----------------------------------------------------|-------------------------|-------------|-----------------------|----------------|---------------|-------------|-----------------------|----------------|---------------|-------------|-------|
|                                                     | Traffic Density         | All Sources | Non-Road Area Sources | Onroad Sources | Point Sources | All Sources | Non-Road Area Sources | Onroad Sources | Point Sources | All Sources |       |
| Non-white                                           | 0.18                    | 0.25        | 0.32                  | 0.15           | -0.08         | 0.32        | 0.31                  | 0.30           | 0.31          | 0.18        | 0.06  |
| Commute by walk/transit                             |                         |             | 0.08                  | 0.08           | 0.08          | 0.09        | 0.16                  | -0.03          |               | 0.04        |       |
| Population Density                                  | 0.27                    | 0.54        | 0.42                  | 0.58           | 0.65          | 0.39        | 0.21                  | 0.52           | 0.42          | 0.42        | 0.16  |
| Age less than 10 years                              | -0.10                   | -0.08       | -0.09                 | -0.05          |               | -0.10       | -0.08                 | -0.09          | -0.08         | -0.09       |       |
| House value > \$250K                                | 0.11                    | 0.23        | 0.17                  | 0.03           | -0.09         | 0.18        | 0.10                  | 0.27           | 0.22          | 0.16        |       |
| Vehicles per Household                              | -0.42                   | -0.33       | -0.28                 | -0.28          | -0.20         | -0.29       | -0.25                 | -0.30          | -0.24         | -0.24       | -0.10 |
| R <sup>2</sup>                                      | 0.40                    | 0.60        | 0.56                  | 0.60           | 0.45          | 0.56        | 0.40                  | 0.58           | 0.46          | 0.35        | 0.05  |

  

| Dependent Variable >>><br>Independent Variables vvv | Non-Cancer Hazard Index |             |                       |                |               |             | Cancer Risk           |                |               |             |       |
|-----------------------------------------------------|-------------------------|-------------|-----------------------|----------------|---------------|-------------|-----------------------|----------------|---------------|-------------|-------|
|                                                     | Traffic Density         | All Sources | Non-Road Area Sources | Onroad Sources | Point Sources | All Sources | Non-Road Area Sources | Onroad Sources | Point Sources | All Sources |       |
| Non-white                                           | -0.01                   | -0.12       | -0.07                 | -0.12          |               | -0.04       |                       | -0.06          | -0.05         |             | -0.07 |
| Commute by walk/transit                             | -0.10                   | -0.09       | -0.06                 | -0.06          | -0.03         | -0.06       | -0.04                 | -0.08          | -0.07         | -0.06       |       |
| Population Density                                  | 0.90                    | 1.01        | 1.08                  | 1.21           | 1.11          | 0.96        | 0.85                  | 1.00           | 0.92          | 0.12        |       |
| Age less than 10 years                              |                         |             |                       | 0.03           |               |             |                       |                |               | -0.05       |       |
| House value > \$250K                                |                         | 0.06        | 0.05                  | 0.08           | 0.06          | 0.07        |                       | 0.07           | 0.07          | -0.09       |       |
| Vehicles per Household                              | -0.36                   | -0.28       | -0.23                 | -0.23          | -0.16         | -0.27       | -0.23                 | -0.25          | -0.19         | -0.13       | -0.08 |
| R <sup>2</sup>                                      | 0.02                    | 0.02        | 0.01                  | 0.02           | 0.02          | 0.01        | 0.01                  | 0.01           | 0.01          | 0.01        | 0.00  |

**Figure S6.** Results of stepwise linear regressions with log-transformed Non-Metro Area (top) and statewide (bottom) data. Each column represents one regression equation with the dependent variable listed at the top of the column and the independent variables defined in column one. The numbers in the body are the regression coefficients for the variables that were significant ( $p < 0.05$ ) in the model. A blank means that the variable did not reach the significance level ( $p < 0.05$ ) to be included in the model. The coefficients of determination (R<sup>2</sup>) are in the bottom row. Positive coefficients are highlighted in green and negative coefficients in red.



|                         | Traffic Density     |       |       | Non-Cancer All Sources   |       |       | Cancer All Sources   |       |       | Non-Cancer Area Sources |       |       |
|-------------------------|---------------------|-------|-------|--------------------------|-------|-------|----------------------|-------|-------|-------------------------|-------|-------|
|                         | 2.5%                | coef  | 97.5% | 2.5%                     | coef  | 97.5% | 2.5%                 | coef  | 97.5% | 2.5%                    | coef  | 97.5% |
| Non-white               | 0.10                | 0.15  | 0.20  | 0.18                     | 0.22  | 0.26  | 0.20                 | 0.25  | 0.29  | 0.17                    | 0.21  | 0.25  |
| Commute by walk/transit | 0.04                | 0.10  | 0.16  | 0.13                     | 0.18  | 0.22  | 0.18                 | 0.23  | 0.28  | 0.16                    | 0.20  | 0.25  |
| Population Density      | -0.09               |       | 0.03  | 0.24                     | 0.29  | 0.33  | 0.10                 | 0.15  | 0.20  | 0.30                    | 0.35  | 0.39  |
| Age less than 10 years  | -0.18               | -0.14 | -0.10 | -0.15                    | -0.12 | -0.09 | -0.12                | -0.09 | -0.05 | -0.13                   | -0.10 | -0.07 |
| House value > \$250K    | -0.12               | -0.07 | -0.02 | -0.15                    | -0.12 | -0.08 | -0.11                | -0.07 | -0.02 | -0.14                   | -0.10 | -0.06 |
| Vehicles per Household  | -0.39               | -0.28 | -0.27 | -0.34                    | -0.30 | -0.26 | -0.34                | -0.29 | -0.25 | -0.29                   | -0.25 | -0.21 |
|                         |                     |       |       |                          |       |       |                      |       |       |                         |       |       |
|                         | Cancer Area Sources |       |       | Non-Cancer Nonroad       |       |       | Cancer Nonroad       |       |       | Non-Cancer Onroad       |       |       |
|                         | 2.5%                | coef  | 97.5% | 2.5%                     | coef  | 97.5% | 2.5%                 | coef  | 97.5% | 2.5%                    | coef  | 97.5% |
| Non-white               | 0.07                | 0.10  | 0.13  | 0.21                     | 0.25  | 0.30  | 0.21                 | 0.26  | 0.31  | 0.21                    | 0.20  | 0.30  |
| Commute by walk/transit | 0.10                | 0.13  | 0.17  | 0.23                     | 0.29  | 0.33  | 0.26                 | 0.32  | 0.37  | 0.23                    | 0.09  | 0.33  |
| Population Density      | 0.63                | 0.66  | 0.69  | 0.05                     | 0.10  | 0.14  | -0.08                |       | 0.03  | 0.05                    | 0.27  | 0.14  |
| Age less than 10 years  | -0.09               | -0.07 | -0.04 | -0.14                    | -0.11 | -0.07 | -0.12                | -0.09 | -0.05 | -0.14                   | -0.11 | -0.07 |
| House value > \$250K    | -0.09               | -0.07 | -0.04 | -0.13                    | -0.09 | -0.05 | -0.08                |       | 0.01  | -0.13                   | -0.12 | -0.05 |
| Vehicles per Household  | -0.23               | -0.20 | -0.17 | -0.32                    | -0.27 | -0.22 | -0.29                | -0.24 | -0.19 | -0.32                   | -0.28 | -0.22 |
|                         |                     |       |       |                          |       |       |                      |       |       |                         |       |       |
|                         | Cancer Onroad       |       |       | Non-Cancer Point Sources |       |       | Cancer Point Sources |       |       |                         |       |       |
|                         | 2.5%                | coef  | 97.5% | 2.5%                     | coef  | 97.5% | 2.5%                 | coef  | 97.5% | 2.5%                    | coef  | 97.5% |
| Non-white               | 0.13                | 0.18  | 0.23  | 0.07                     | 0.12  | 0.17  | -0.03                |       | 0.09  |                         |       |       |
| Commute by walk/transit | 0.04                | 0.10  | 0.16  | 0.21                     | 0.26  | 0.32  | -0.02                |       | 0.12  |                         |       |       |
| Population Density      | 0.12                | 0.18  | 0.24  | 0.24                     | 0.30  | 0.35  | 0.03                 | 0.09  | 0.16  |                         |       |       |
| Age less than 10 years  | -0.11               | -0.07 | -0.03 | -0.12                    | -0.09 | -0.05 | -0.08                |       | 0.02  |                         |       |       |
| House value > \$250K    | -0.11               | -0.06 | -0.02 | -0.05                    |       | 0.04  | -0.21                | -0.15 | -0.09 |                         |       |       |
| Vehicles per Household  | -0.32               | -0.26 | -0.21 | -0.31                    | -0.26 | -0.20 | -0.08                |       | 0.05  |                         |       |       |

Figure S7. Confidence intervals for coefficients in the final regression models.

|                          | Traffic density | Cancer Risk     |                  |              |               |             | Non-Cancer Hazard Index |                  |              |               |             |
|--------------------------|-----------------|-----------------|------------------|--------------|---------------|-------------|-------------------------|------------------|--------------|---------------|-------------|
|                          |                 | on-road sources | non-road sources | area sources | point sources | all sources | on-road sources         | non-road sources | area sources | point sources | all sources |
| Population Average       | 1.77            | 2.2E-04         | 1.3E-04          | 4.8E-05      | 5.3E-06       | 4.0E-04     | 0.60                    | 0.36             | 0.47         | 0.23          | 1.66        |
| Asian                    | 2.95            | 3.9E-04         | 2.6E-04          | 6.6E-05      | 7.8E-06       | 7.2E-04     | 1.01                    | 0.68             | 0.74         | 0.34          | 2.78        |
| Black                    | 4.30            | 4.9E-04         | 3.2E-04          | 8.4E-05      | 9.0E-06       | 9.0E-04     | 1.28                    | 0.83             | 0.98         | 0.51          | 3.61        |
| Hispanic                 | 2.75            | 3.3E-04         | 2.1E-04          | 6.2E-05      | 7.9E-06       | 6.1E-04     | 0.86                    | 0.56             | 0.68         | 0.35          | 2.46        |
| American Indian          | 1.66            | 1.7E-04         | 1.3E-04          | 4.9E-05      | 3.8E-06       | 3.6E-04     | 0.48                    | 0.34             | 0.50         | 0.21          | 1.52        |
| NonWhite                 | 3.14            | 3.8E-04         | 2.5E-04          | 6.8E-05      | 7.8E-06       | 7.0E-04     | 0.99                    | 0.65             | 0.77         | 0.39          | 2.80        |
| White                    | 1.51            | 1.9E-04         | 1.1E-04          | 4.4E-05      | 4.8E-06       | 3.5E-04     | 0.52                    | 0.31             | 0.41         | 0.21          | 1.44        |
| Less than High School    | 2.13            | 2.3E-04         | 1.6E-04          | 5.4E-05      | 5.4E-06       | 4.6E-04     | 0.64                    | 0.42             | 0.55         | 0.26          | 1.87        |
| Bachelors Degree         | 1.92            | 2.5E-04         | 1.4E-04          | 4.8E-05      | 5.6E-06       | 4.4E-04     | 0.67                    | 0.39             | 0.48         | 0.27          | 1.81        |
| House Value > \$250K     | 1.39            | 1.1E-04         | 1.1E-04          | 3.7E-05      | 4.8E-06       | 2.6E-04     | 0.56                    | 0.31             | 0.36         | 0.21          | 1.44        |
| Owner Occupied Housing   | 1.42            | 1.9E-04         | 1.1E-04          | 4.2E-05      | 4.9E-06       | 3.4E-04     | 0.52                    | 0.30             | 0.39         | 0.21          | 1.42        |
| Rent < \$700             | 3.39            | 2.9E-04         | 2.2E-04          | 8.2E-05      | 6.7E-06       | 5.9E-04     | 0.80                    | 0.55             | 0.79         | 0.34          | 2.48        |
| Rent > 30% Income        | 3.58            | 3.5E-04         | 2.4E-04          | 7.9E-05      | 7.3E-06       | 6.8E-04     | 0.95                    | 0.63             | 0.83         | 0.39          | 2.80        |
| Rental Housing           | 3.34            | 3.3E-04         | 2.2E-04          | 7.4E-05      | 7.1E-06       | 6.3E-04     | 0.89                    | 0.58             | 0.77         | 0.36          | 2.60        |
| >1 Vehicles in Household | 1.43            | 1.9E-04         | 1.1E-04          | 4.2E-05      | 4.7E-06       | 3.4E-04     | 0.51                    | 0.30             | 0.39         | 0.20          | 1.41        |
| Commute by Walk/Transit  | 3.26            | 3.4E-04         | 2.5E-04          | 7.5E-05      | 7.4E-06       | 6.7E-04     | 0.92                    | 0.64             | 0.82         | 0.41          | 2.80        |
| Drove Alone              | 1.66            | 2.1E-04         | 1.2E-04          | 4.5E-05      | 5.2E-06       | 3.8E-04     | 0.58                    | 0.34             | 0.44         | 0.22          | 1.57        |
| No Vehicles in Household | 4.03            | 3.7E-04         | 2.6E-04          | 8.6E-05      | 7.6E-06       | 7.3E-04     | 0.99                    | 0.68             | 0.89         | 0.42          | 2.98        |
| Below 100% of Poverty    | 2.84            | 2.9E-04         | 2.2E-04          | 7.1E-05      | 6.3E-06       | 5.9E-04     | 0.80                    | 0.56             | 0.74         | 0.33          | 2.42        |
| Below 150% of Poverty    | 2.59            | 2.7E-04         | 1.9E-04          | 6.5E-05      | 6.1E-06       | 5.3E-04     | 0.74                    | 0.50             | 0.67         | 0.30          | 2.21        |
| HH Income > \$60K        | 1.60            | 2.1E-04         | 1.2E-04          | 4.3E-05      | 5.3E-06       | 3.8E-04     | 0.59                    | 0.34             | 0.42         | 0.23          | 1.57        |
| Children Under 10        | 1.66            | 2.2E-04         | 1.3E-04          | 4.7E-05      | 5.2E-06       | 4.0E-04     | 0.59                    | 0.35             | 0.46         | 0.22          | 1.62        |
| Over 65                  | 1.63            | 1.9E-04         | 1.1E-04          | 4.4E-05      | 4.7E-06       | 3.5E-04     | 0.52                    | 0.30             | 0.41         | 0.21          | 1.44        |

**Figure S8.** Breakdown of the Statewide traffic density, cancer risks, and non-cancer hazard indices by demographic group and pollution source category.
